# Supplementary material for: Bifunctional π-conjugated ligand assisted stable and efficient perovskite solar cell fabrication via interfacial stitching
Source: Royal Society of Chemistry journal article supplement (doi:10.1039/c9ta03898a), 2019-01-01
Supplement: c9ta03898a1.pdf [file c9ta03898a1.pdf]

## Supporting Information

### Bifunctional $\pi$ -conjugated ligand assisted stable and efficient perovskite solar cells via interfacial stitching

Feijie Wei,<sup>a</sup> Bo Jiao,<sup>a,b</sup> Hua Dong,<sup>a,b\*</sup> Jie Xu,<sup>a</sup> Ting Lei,<sup>a</sup> Yue Yu,<sup>c,d</sup> Lin Ma,<sup>d</sup> Junjie Zhang,<sup>c</sup> Dongdong Wang,<sup>c</sup> Jinbo Chen,<sup>a</sup> Xun Hou<sup>a</sup> and Zhaoxin Wu<sup>a,b\*</sup>

<sup>a</sup>Key Laboratory for Physical Electronics and Devices of the Ministry of Education & Shaanxi Key Lab of Information Photonic Technique, School of Electronic and Information Engineering, Xi'an Jiaotong University, No.28, Xianning West Road, Xi'an, 710049, China.

<sup>b</sup>Collaborative Innovation Center of Extreme Optics, Shanxi University, Taiyuan 030006, China

<sup>c</sup>Department of Chemistry, School of Science, Xi'an Jiaotong University, Xi'an 710049, China

<sup>d</sup>School of Physics and Optoelectronic Engineering, Xidian University, Xi'an 710071, China.

**\*Corresponding author.**

**E-mail: donghuaxjtu@mail.xjtu.edu.cn**

**E-mail: zhaoxinwu@mail.xjtu.edu.cn**

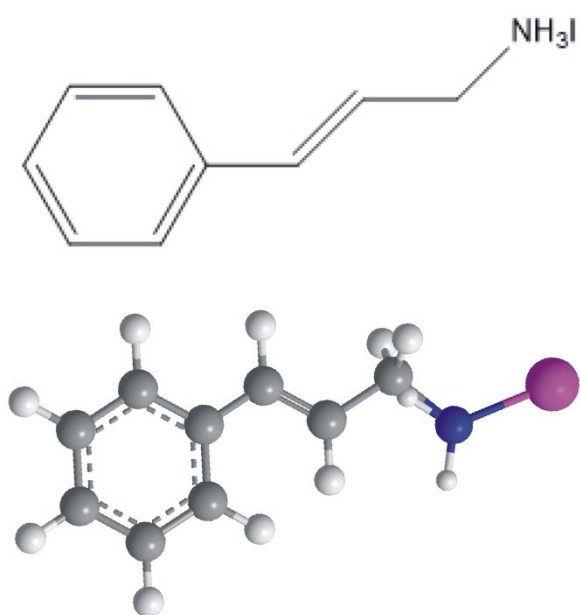

**Figure S1.** Molecule structure of the PPEAI

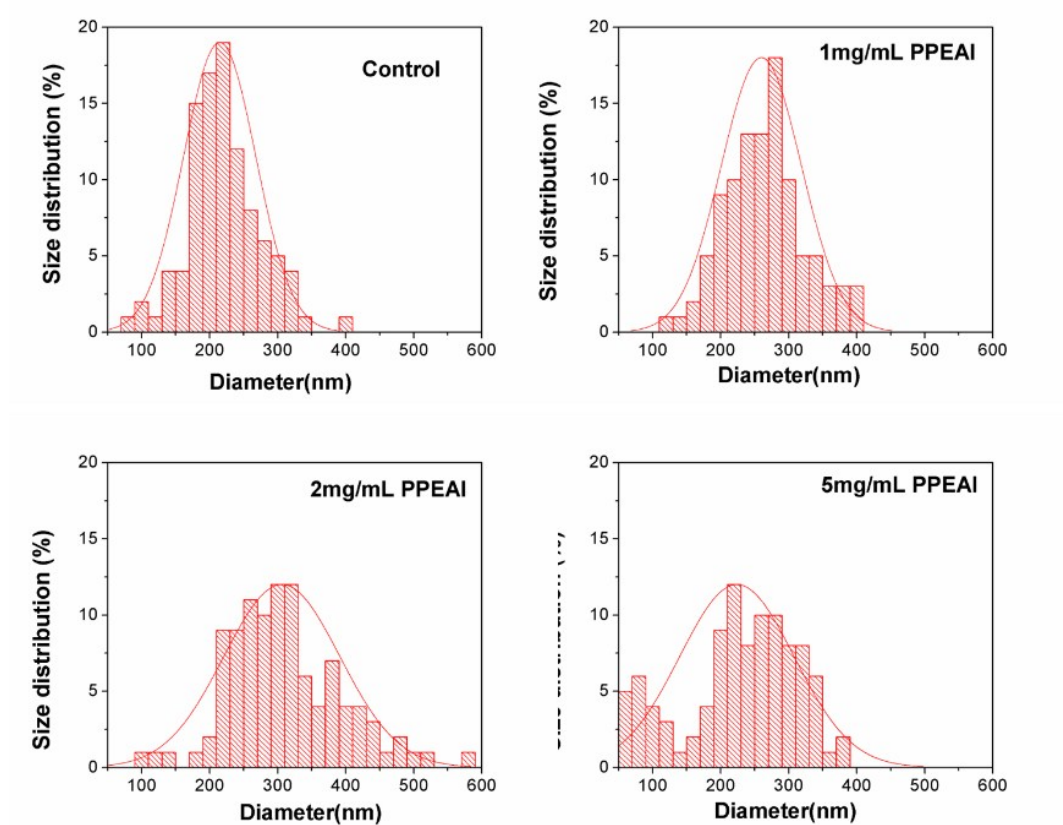

**Figure S2** Size distribution of the morphology for different perovskite films

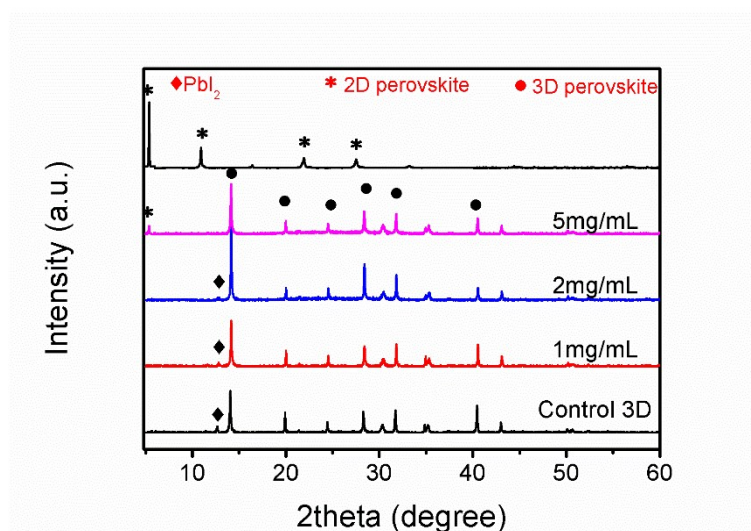

**Figure S3** XRD date of different perovskite films

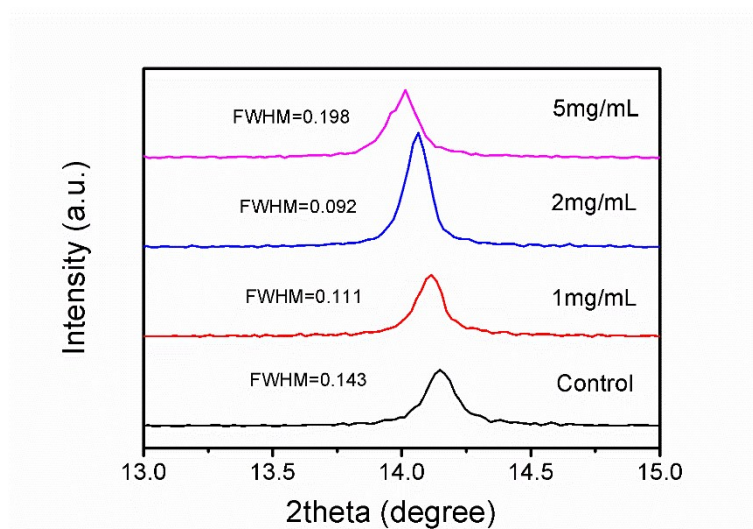

**Figure S4.** Enlarged XRD of the control and PPEAI modified perovskite films

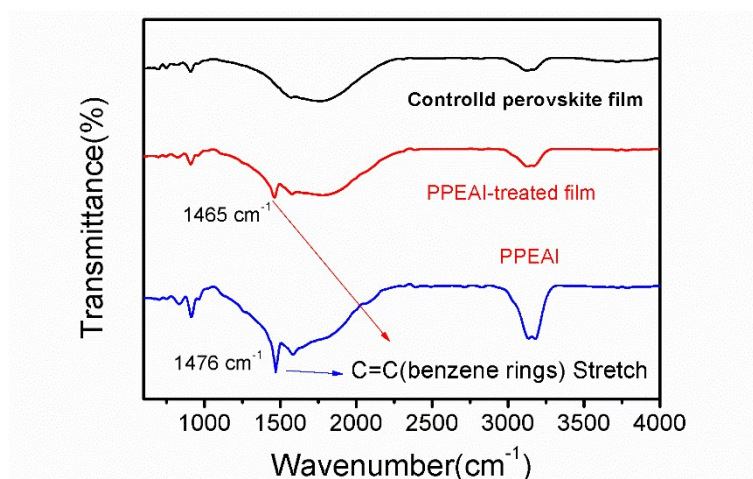

**Figure S5.** FTIR spectrum of PPEAI powder, controlled and PPEAI-modified perovskite films(2mg/ml).

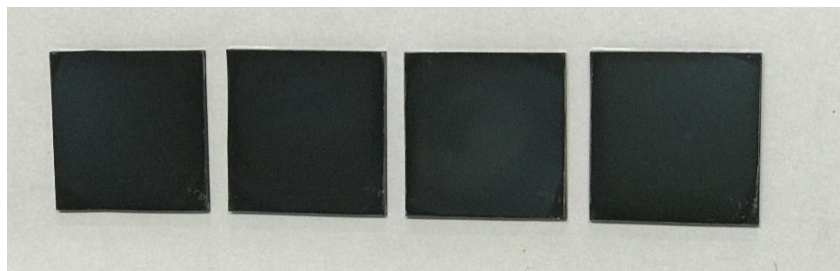

**Figure S6.** From left to right: 0mg/ml, 1mg/ml, 2mg/ml, 5mg/ml PPEAI modified perovskite films.

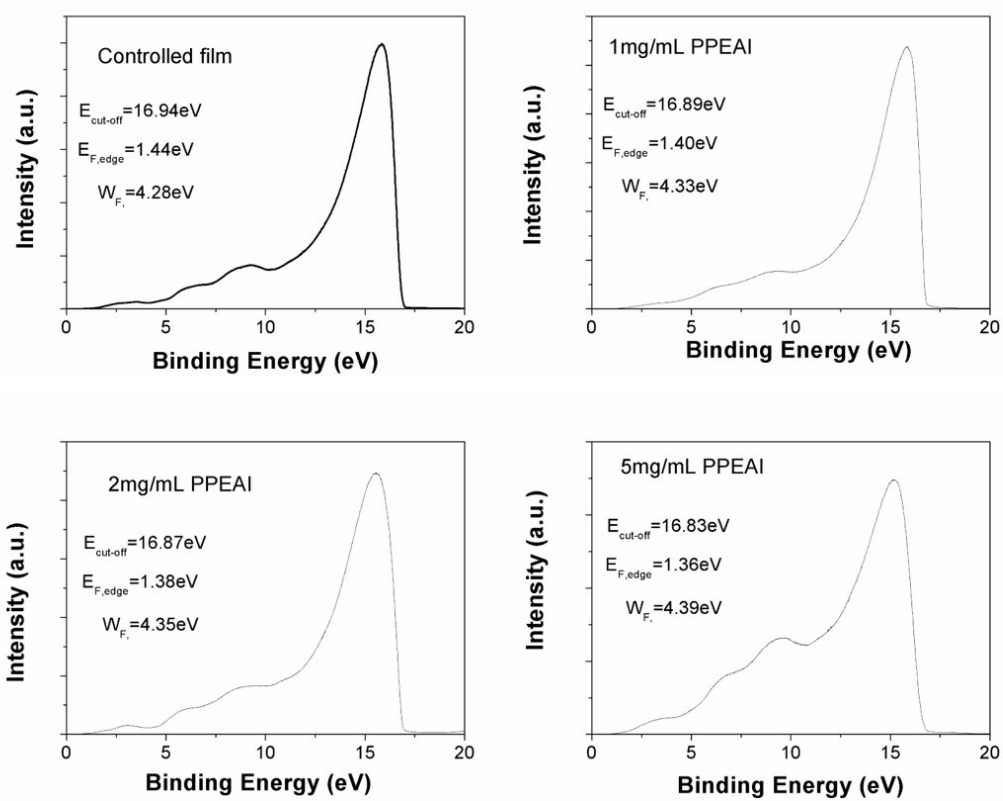

**Figure S7** UPS spectra of different perovskite films



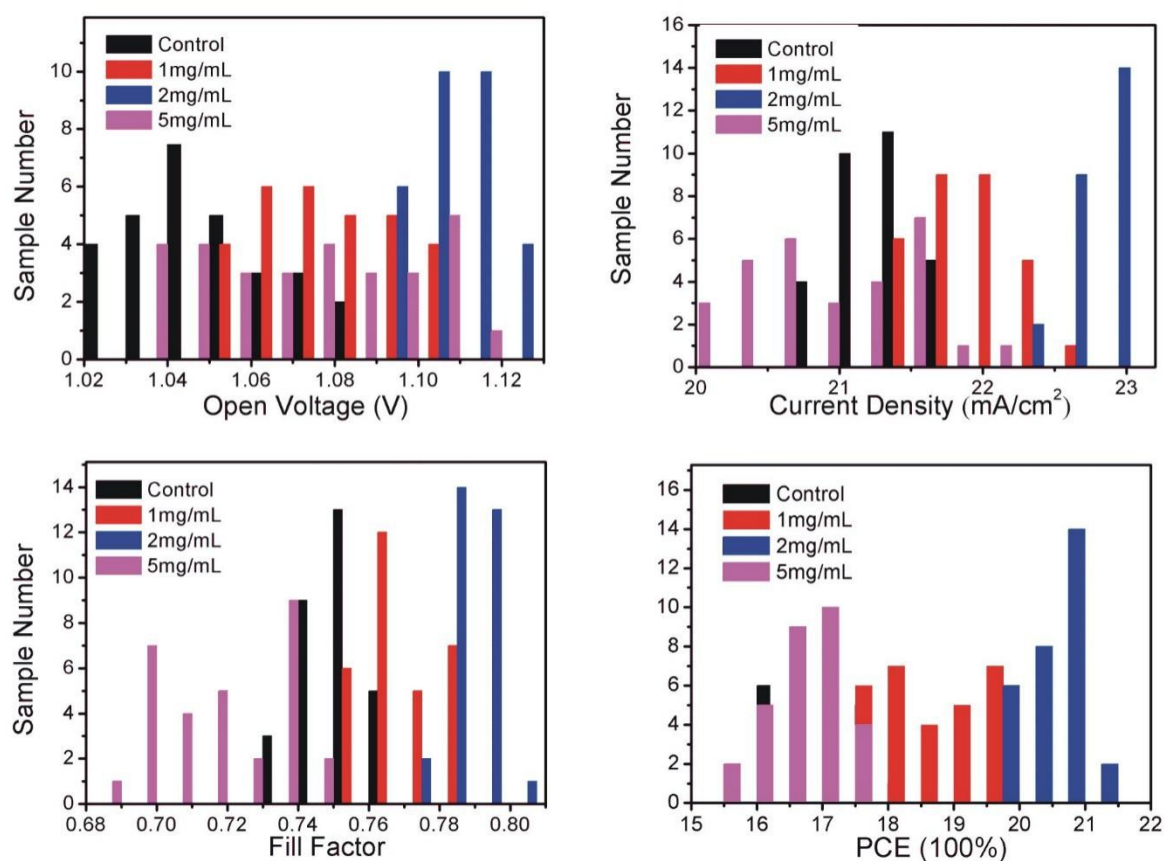

**Figure S8.** Parameter Statistics of the PSCs employing different perovskite films

**Table S1** Performance parameters of PSCs with different perovskite films (30 devices for each type)

| Concentrations of the PPEAI | $V_{oc}(V)$  | $J_{sc}(mA\ cm^{-2})$ | FF          | PCE(%)     |
|-----------------------------|--------------|-----------------------|-------------|------------|
| Control                     | 1.0679±0.021 | 21.53±0.54            | 0.743±0.015 | 17.04±0.69 |
| 1mg/ml                      | 1.097±0.017  | 21.98±0.62            | 0.779±0.013 | 18.89±0.71 |
| 2mg/ml                      | 1.119±0.012  | 22.87±0.81            | 0.784±0.012 | 20.12±0.54 |
| 5mg/ml                      | 1.102±0.015  | 20.84±0.61            | 0.711±0.011 | 16.48±0.57 |

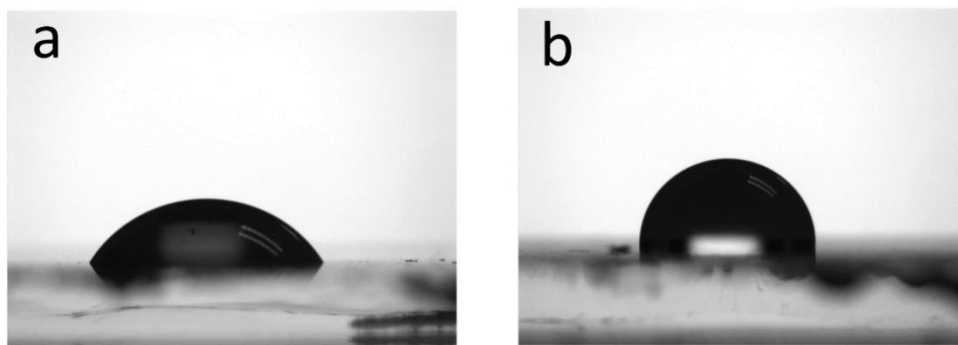

**Figure S9.** Contact angle measurement of (a) controlled and (b) PPEAI modified films.

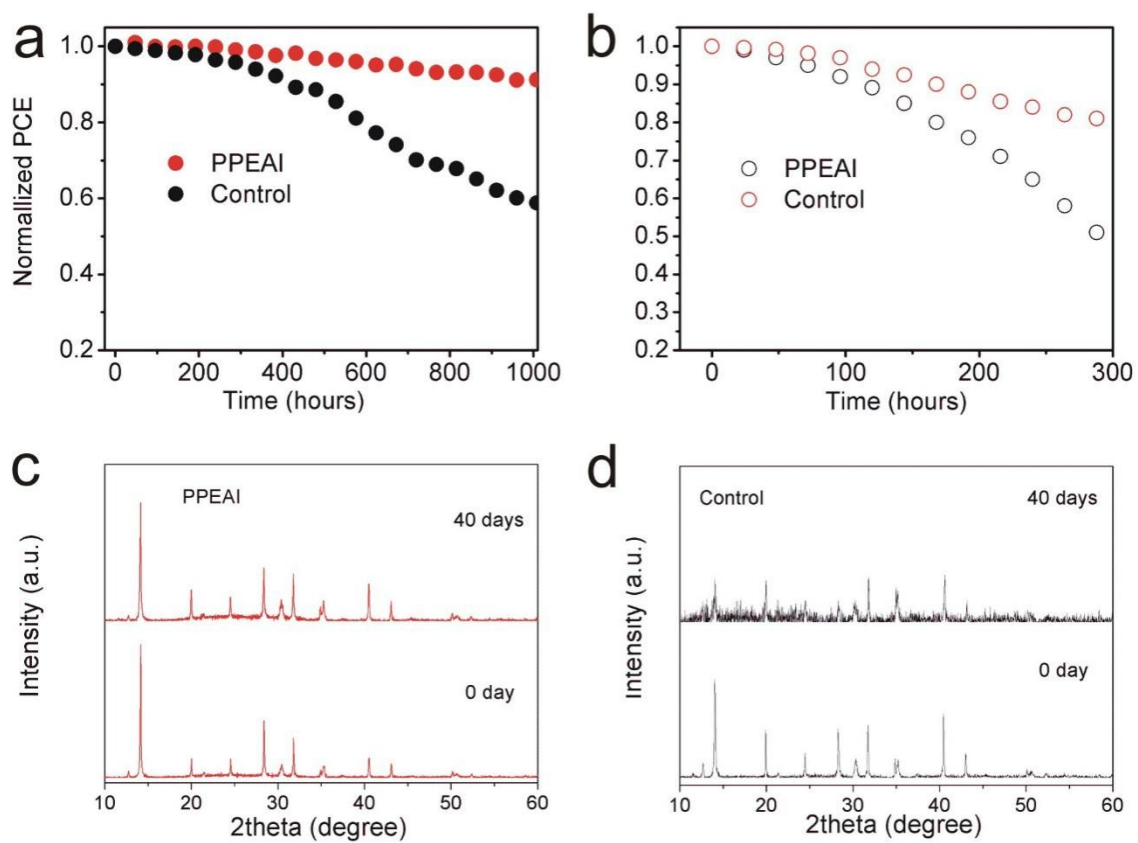

**Figure S10.** Efficiency evolution of the devices with/without PPEAI under dark and operation condition. (room temperature and humidity ~50% in ambient air)
